# Supplementary material for: Silent Pauses and Speech Indices as Biomarkers for Primary Progressive Aphasia
Source: MDPI journal article supplement (doi:10.3390/medicina58101352), 2022-09-27
Supplement: s1 [file s1]

## ANOVAOneWay—Supplementary Material

### Input Data

|                    | Data                                   | Range    |
|--------------------|----------------------------------------|----------|
| Dependent Variable | pauses frequency – picture description | [1*:37*] |
| Factor             | Diagnosis                              | [1*:37*] |

### Descriptive Statistics

|           | N Analysis | N Missing | Mean     | Standard Deviation | SE of Mean |
|-----------|------------|-----------|----------|--------------------|------------|
| Healthy   | 17         | 0         | 14,02461 | 5,6611             | 1,37302    |
| nonfluent | 6          | 0         | 56,29999 | 13,87559           | 5,66469    |
| logopenic | 8          | 0         | 26,86889 | 5,75405            | 2,03437    |
| semantic  | 6          | 0         | 19,97213 | 5,06341            | 2,06713    |

### Overall ANOVA

|       | DF | Sum of Squares | Mean Square | F Value  | Prob>F     |
|-------|----|----------------|-------------|----------|------------|
| Model | 3  | 8100,26596     | 2700,08865  | 48,54731 | 3,3656E-12 |
| Error | 33 | 1835,38326     | 55,61767    |          |            |
| Total | 36 | 9935,64922     |             |          |            |

**Null Hypothesis:** The means of all levels are equal.

**Alternative Hypothesis:** The means of one or more levels are different.

**At the 0.05 level, the population means are significantly different.**

### Tukey Test

|                     | MeanDiff  | SEM     | q Value  | Prob       | Alpha | Sig | LCL       | UCL       |
|---------------------|-----------|---------|----------|------------|-------|-----|-----------|-----------|
| nonfluent Healthy   | 42,27538  | 3,54136 | 16,88233 | 0          | 0,05  | 1   | 32,69618  | 51,85458  |
| logopenic Healthy   | 12,84428  | 3,19747 | 5,68091  | 0,00174    | 0,05  | 1   | 4,19528   | 21,49328  |
| logopenic nonfluent | -29,4311  | 4,02763 | 10,33408 | 1,06792E-7 | 0,05  | 1   | -40,32563 | -18,53656 |
| semantic Healthy    | 5,94751   | 3,54136 | 2,37509  | 0,35034    | 0,05  | 0   | -3,63168  | 15,52671  |
| semantic nonfluent  | -36,32787 | 4,30572 | 11,93189 | 0          | 0,05  | 1   | -47,97461 | -24,68112 |
| semantic logopenic  | -6,89677  | 4,02763 | 2,42165  | 0,33362    | 0,05  | 0   | -17,7913  | 3,99777   |

### Input Data

|                    | Data                                        | Range    |
|--------------------|---------------------------------------------|----------|
| Dependent Variable | pauses total duration – Picture Description | [1*:37*] |
| Factor             | Diagnosis                                   | [1*:37*] |

### Descriptive Statistics

|           | N Analysis | N Missing | Mean         | Standard Deviation | SE of Mean  |
|-----------|------------|-----------|--------------|--------------------|-------------|
| Healthy   | 17         | 0         | 14434,8259   | 8067,22619         | 1956,58975  |
| nonfluent | 6          | 0         | 124505,85942 | 44032,71288        | 17976,27976 |
| logopenic | 8          | 0         | 40787,76304  | 19299,42108        | 6823,37576  |
| semantic  | 6          | 0         | 29794,09106  | 16353,05349        | 6676,10613  |

### Overall ANOVA

|       | DF | Sum of Squares | Mean Square | F Value  | Prob>F      |
|-------|----|----------------|-------------|----------|-------------|
| Model | 3  | 5,45799E10     | 1,81933E10  | 40,89758 | 3,20259E-11 |
| Error | 33 | 1,46801E10     | 4,44851E8   |          |             |
| Total | 36 | 6,926E10       |             |          |             |

**Null Hypothesis:** The means of all levels are equal.

**Alternative Hypothesis:** The means of one or more levels are different.

**At the 0.05 level, the population means are significantly different.**

### Tukey Test

|                     | MeanDiff     | SEM         | q Value  | Prob       | Alpha | Sig | LCL           | UCL          |
|---------------------|--------------|-------------|----------|------------|-------|-----|---------------|--------------|
| nonfluent Healthy   | 110071,03352 | 10015,45941 | 15,54237 | 8,06456E-9 | 0,05  | 1   | 82979,7423    | 137162,32473 |
| logopenic Healthy   | 26352,93714  | 9042,89719  | 4,12132  | 0,03076    | 0,05  | 1   | 1892,3756     | 50813,49867  |
| logopenic nonfluent | -83718,09638 | 11390,70074 | 10,39403 | 9,20834E-8 | 0,05  | 1   | -114529,34311 | -52906,84965 |
| semantic Healthy    | 15359,26516  | 10015,45941 | 2,16878  | 0,42966    | 0,05  | 0   | -11732,02606  | 42450,55637  |
| semantic nonfluent  | -94711,76836 | 12177,17131 | 10,99949 | 1,0752E-8  | 0,05  | 1   | -127650,37663 | -61773,1601  |
| semantic logopenic  | -10993,67198 | 11390,70074 | 1,36492  | 0,76993    | 0,05  | 0   | -41804,91871  | 19817,57475  |

### Input Data

|                    | Data                              | Range    |
|--------------------|-----------------------------------|----------|
| Dependent Variable | speech rate – Picture Description | [1*:37*] |
| Factor             | Diagnosis                         | [1*:37*] |

### Descriptive Statistics

|           | N Analysis | N Missing | Mean      | Standard Deviation | SE of Mean |
|-----------|------------|-----------|-----------|--------------------|------------|
| Healthy   | 17         | 0         | 125,82959 | 23,23354           | 5,63496    |
| nonfluent | 6          | 0         | 32,50667  | 10,4572            | 4,26913    |
| logopenic | 8          | 0         | 64,95125  | 17,22164           | 6,08877    |
| semantic  | 6          | 0         | 101,48333 | 36,11262           | 14,74292   |

### Overall ANOVA

|       | DF | Sum of Squares | Mean Square | F Value  | Prob>F    |
|-------|----|----------------|-------------|----------|-----------|
| Model | 3  | 46991,94245    | 15663,98082 | 29,07226 | 2,1972E-9 |
| Error | 33 | 17780,22584    | 538,79472   |          |           |
| Total | 36 | 64772,16829    |             |          |           |

Null Hypothesis: The means of all levels are equal.

Alternative Hypothesis: The means of one or more levels are different.

**At the 0.05 level, the population means are significantly different.**

### Tukey Test

|                     | MeanDiff  | SEM      | q Value  | Prob       | Alpha | Sig | LCL        | UCL       |
|---------------------|-----------|----------|----------|------------|-------|-----|------------|-----------|
| nonfluent Healthy   | -93,32292 | 11,02238 | 11,97369 | 0          | 0,05  | 1   | -123,13789 | -63,50796 |
| logopenic Healthy   | -60,87834 | 9,95204  | 8,65099  | 3,94443E-6 | 0,05  | 1   | -87,79809  | -33,95859 |
| logopenic nonfluent | 32,44458  | 12,53589 | 3,66018  | 0,06486    | 0,05  | 0   | -1,46433   | 66,3535   |
| semantic Healthy    | -24,34626 | 11,02238 | 3,12372  | 0,14189    | 0,05  | 0   | -54,16122  | 5,46871   |
| semantic nonfluent  | 68,97667  | 13,40143 | 7,27891  | 6,80716E-5 | 0,05  | 1   | 32,72651   | 105,22682 |
| semantic logopenic  | 36,53208  | 12,53589 | 4,1213   | 0,03076    | 0,05  | 1   | 2,62317    | 70,441    |

### Input Data

|                    | Data                                    | Range    |
|--------------------|-----------------------------------------|----------|
| Dependent Variable | articulation rate – Picture Description | [1*:37*] |
| Factor             | Diagnosis                               | [1*:37*] |

### Descriptive Statistics

|           | N Analysis | N Missing | Mean      | Standard Deviation | SE of Mean |
|-----------|------------|-----------|-----------|--------------------|------------|
| Healthy   | 17         | 0         | 181,25705 | 27,04716           | 6,5599     |
| nonfluent | 6          | 0         | 85,45622  | 10,91896           | 4,45765    |
| logopenic | 8          | 0         | 120,96077 | 24,29866           | 8,59087    |
| semantic  | 6          | 0         | 179,62652 | 45,82654           | 18,70861   |

### Overall ANOVA

|       | DF | Sum of Squares | Mean Square | F Value | Prob>F    |
|-------|----|----------------|-------------|---------|-----------|
| Model | 3  | 53400,30263    | 17800,10088 | 21,8088 | 5,7209E-8 |
| Error | 33 | 26934,23158    | 816,18884   |         |           |
| Total | 36 | 80334,53421    |             |         |           |

Null Hypothesis: The means of all levels are equal.

Alternative Hypothesis: The means of one or more levels are different.

**At the 0.05 level, the population means are significantly different.**

### Tukey Test

|                     | MeanDiff  | SEM      | q Value | Prob       | Alpha | Sig | LCL        | UCL       |
|---------------------|-----------|----------|---------|------------|-------|-----|------------|-----------|
| nonfluent Healthy   | -95,80083 | 13,56623 | 9,98677 | 2,37793E-7 | 0,05  | 1   | -132,49677 | -59,10489 |
| logopenic Healthy   | -60,29628 | 12,24887 | 6,96161 | 1,31051E-4 | 0,05  | 1   | -93,42882  | -27,16374 |
| logopenic nonfluent | 35,50455  | 15,42903 | 3,25432 | 0,11837    | 0,05  | 0   | -6,23017   | 77,23928  |
| semantic Healthy    | -1,63053  | 13,56623 | 0,16997 | 0,99937    | 0,05  | 0   | -38,32647  | 35,06541  |
| semantic nonfluent  | 94,1703   | 16,49433 | 8,0741  | 1,30728E-5 | 0,05  | 1   | 49,554     | 138,7866  |
| semantic logopenic  | 58,66575  | 15,42903 | 5,37726 | 0,00314    | 0,05  | 1   | 16,93102   | 100,40047 |

### Input Data

|                    | Data                              | Range    |
|--------------------|-----------------------------------|----------|
| Dependent Variable | pauses frequency – Personal story | [1*:37*] |
| Factor             | Diagnosis                         | [1*:37*] |

### Descriptive Statistics

|           | N Analysis | N Missing | Mean     | Standard Deviation | SE of Mean |
|-----------|------------|-----------|----------|--------------------|------------|
| Healthy   | 17         | 0         | 17,84361 | 3,55792            | 0,86292    |
| nonfluent | 6          | 0         | 48,65876 | 7,17476            | 2,92908    |
| logopenic | 8          | 0         | 27,16367 | 11,65097           | 4,11924    |
| semantic  | 6          | 0         | 14,69024 | 4,22283            | 1,72396    |

### Overall ANOVA

|       | DF | Sum of Squares | Mean Square | F Value  | Prob>F     |
|-------|----|----------------|-------------|----------|------------|
| Model | 3  | 4888,35861     | 1629,45287  | 35,86462 | 1,7005E-10 |
| Error | 33 | 1499,30349     | 45,43344    |          |            |
| Total | 36 | 6387,6621      |             |          |            |

Null Hypothesis: The means of all levels are equal.

Alternative Hypothesis: The means of one or more levels are different.

**At the 0.05 level, the population means are significantly different.**

### Tukey Test

#### Tukey Test

|                     | MeanDiff  | SEM     | q Value  | Prob       | Alpha | Sig | LCL       | UCL       |
|---------------------|-----------|---------|----------|------------|-------|-----|-----------|-----------|
| nonfluent Healthy   | 30,81516  | 3,20075 | 13,61532 | 1,00099E-7 | 0,05  | 1   | 22,1573   | 39,47301  |
| logopenic Healthy   | 9,32006   | 2,88994 | 4,56085  | 0,01435    | 0,05  | 1   | 1,50294   | 17,13719  |
| logopenic nonfluent | -21,49509 | 3,64025 | 8,3507   | 7,3594E-6  | 0,05  | 1   | -31,34178 | -11,64841 |
| semantic Healthy    | -3,15337  | 3,20075 | 1,39328  | 0,75878    | 0,05  | 0   | -11,81123 | 5,50449   |
| semantic nonfluent  | -33,96853 | 3,89159 | 12,34425 | 8,22798E-9 | 0,05  | 1   | -44,49508 | -23,44198 |
| semantic logopenic  | -12,47344 | 3,64025 | 4,84585  | 0,00856    | 0,05  | 1   | -22,32012 | -2,62675  |

### Input Data

|                    | Data                                   | Range    |
|--------------------|----------------------------------------|----------|
| Dependent Variable | pauses total duration – personal story | [1*:37*] |
| Factor             | Diagnosis                              | [1*:37*] |

### Descriptive Statistics

|           | N Analysis | N Missing | Mean        | Standard Deviation | SE of Mean  |
|-----------|------------|-----------|-------------|--------------------|-------------|
| Healthy   | 17         | 0         | 16439,90813 | 5438,10544         | 1318,9343   |
| nonfluent | 6          | 0         | 85605,37045 | 40410,35248        | 16497,45732 |
| logopenic | 8          | 0         | 33413,48941 | 19437,12084        | 6872,05998  |
| semantic  | 6          | 0         | 12261,4798  | 5093,62379         | 2079,4632   |

### Overall ANOVA

|       | DF | Sum of Squares | Mean Square | F Value  | Prob>F     |
|-------|----|----------------|-------------|----------|------------|
| Model | 3  | 2,36432E10     | 7,88108E9   | 22,78868 | 3,54384E-8 |
| Error | 33 | 1,14125E10     | 3,45833E8   |          |            |
| Total | 36 | 3,50557E10     |             |          |            |

Null Hypothesis: The means of all levels are equal.

Alternative Hypothesis: The means of one or more levels are different.

**At the 0.05 level, the population means are significantly different.**

### Tukey Test

|                     | MeanDiff     | SEM         | q Value  | Prob       | Alpha | Sig | LCL           | UCL          |
|---------------------|--------------|-------------|----------|------------|-------|-----|---------------|--------------|
| nonfluent Healthy   | 69165,46232  | 8830,73839  | 11,07662 | 5,73881E-9 | 0,05  | 1   | 45278,77919   | 93052,14546  |
| logopenic Healthy   | 16973,58128  | 7973,21981  | 3,01061  | 0,16513    | 0,05  | 0   | -4593,55917   | 38540,72173  |
| logopenic nonfluent | -52191,88104 | 10043,30348 | 7,34922  | 5,88526E-5 | 0,05  | 1   | -79358,48901  | -25025,27308 |
| semantic Healthy    | -4178,42833  | 8830,73839  | 0,66916  | 0,96446    | 0,05  | 0   | -28065,11147  | 19708,25481  |
| semantic nonfluent  | -73343,89065 | 10736,74305 | 9,66065  | 4,80938E-7 | 0,05  | 1   | -102386,21619 | -44301,56512 |
| semantic logopenic  | -21152,00961 | 10043,30348 | 2,97845  | 0,17225    | 0,05  | 0   | -48318,61758  | 6014,59836   |

### Input Data

|                    | Data                         | Range    |
|--------------------|------------------------------|----------|
| Dependent Variable | speech rate – personal story | [1*:37*] |
| Factor             | Diagnosis                    | [1*:37*] |

There exist missing values in the input data.

### Descriptive Statistics

|           | N Analysis | N Missing | Mean      | Standard Deviation | SE of Mean |
|-----------|------------|-----------|-----------|--------------------|------------|
| Healthy   | 15         | 2         | 118,87011 | 27,51971           | 7,10556    |
| nonfluent | 6          | 0         | 38,38333  | 14,53512           | 5,93394    |
| logopenic | 8          | 0         | 80,9375   | 33,61284           | 11,88393   |
| semantic  | 6          | 0         | 130,06667 | 31,63667           | 12,91562   |

### Overall ANOVA

|       | DF | Sum of Squares | Mean Square | F Value  | Prob>F    |
|-------|----|----------------|-------------|----------|-----------|
| Model | 3  | 36353,344      | 12117,78133 | 15,28766 | 2,7664E-6 |
| Error | 31 | 24572,18299    | 792,65106   |          |           |
| Total | 34 | 60925,52699    |             |          |           |

Null Hypothesis: The means of all levels are equal.

Alternative Hypothesis: The means of one or more levels are different.

**At the 0.05 level, the population means are significantly different.**

### Tukey Test

|                     | MeanDiff  | SEM      | q Value | Prob       | Alpha | Sig | LCL        | UCL      |
|---------------------|-----------|----------|---------|------------|-------|-----|------------|----------|
| nonfluent Healthy   | -80,48678 | 13,5997  | 8,3697  | 8,88001E-6 | 0,05  | 1   | -117,39735 | -43,5762 |
| logopenic Healthy   | -37,93261 | 12,32578 | 4,35225 | 0,02141    | 0,05  | 1   | -71,38565  | -4,47956 |
| logopenic nonfluent | 42,55417  | 15,20493 | 3,95797 | 0,04129    | 0,05  | 1   | 1,28689    | 83,82144 |
| semantic Healthy    | 11,19656  | 13,5997  | 1,16431 | 0,843      | 0,05  | 0   | -25,71401  | 48,10713 |
| semantic nonfluent  | 91,68333  | 16,25475 | 7,97673 | 1,95874E-5 | 0,05  | 1   | 47,56676   | 135,7999 |
| semantic logopenic  | 49,12917  | 15,20493 | 4,56951 | 0,01469    | 0,05  | 1   | 7,86189    | 90,39644 |

### Input Data

|                    | Data                               | Range    |
|--------------------|------------------------------------|----------|
| Dependent Variable | articulation rate – personal story | [1*:37*] |
| Factor             | Diagnosis                          | [1*:37*] |

### Descriptive Statistics

|           | N Analysis | N Missing | Mean      | Standard Deviation | SE of Mean |
|-----------|------------|-----------|-----------|--------------------|------------|
| Healthy   | 17         | 0         | 155,89221 | 23,59668           | 5,72303    |
| nonfluent | 6          | 0         | 76,95149  | 14,02638           | 5,72625    |
| logopenic | 8          | 0         | 132,25786 | 42,01267           | 14,85372   |
| semantic  | 6          | 0         | 155,39384 | 40,1916            | 16,40815   |

### Overall ANOVA

|       | DF | Sum of Squares | Mean Square | F Value  | Prob>F     |
|-------|----|----------------|-------------|----------|------------|
| Model | 3  | 29882,43361    | 9960,8112   | 10,83953 | 4,13354E-5 |
| Error | 33 | 30324,82108    | 918,93397   |          |            |
| Total | 36 | 60207,25469    |             |          |            |

Null Hypothesis: The means of all levels are equal.

Alternative Hypothesis: The means of one or more levels are different.

**At the 0.05 level, the population means are significantly different.**

### Tukey Test

|                     | MeanDiff  | SEM      | q Value | Prob       | Alpha | Sig | LCL        | UCL       |
|---------------------|-----------|----------|---------|------------|-------|-----|------------|-----------|
| nonfluent Healthy   | -78,94072 | 14,39481 | 7,7555  | 2,53405E-5 | 0,05  | 1   | -117,87793 | -40,00351 |
| logopenic Healthy   | -23,63435 | 12,99699 | 2,57167 | 0,283      | 0,05  | 0   | -58,79052  | 11,52182  |
| logopenic nonfluent | 55,30637  | 16,37139 | 4,77754 | 0,0097     | 0,05  | 1   | 11,02262   | 99,59011  |
| semantic Healthy    | -0,49837  | 14,39481 | 0,04896 | 0,99998    | 0,05  | 0   | -39,43558  | 38,43884  |
| semantic nonfluent  | 78,44235  | 17,50175 | 6,33846 | 4,68173E-4 | 0,05  | 1   | 31,10103   | 125,78367 |
| semantic logopenic  | 23,13598  | 16,37139 | 1,99856 | 0,50032    | 0,05  | 0   | -21,14777  | 67,41973  |
